# Supplementary figures and images for: Changes in Soil Chemical Properties and Bacterial Community Composition of Jujube Orchard Due to Oil Cake Fertilization
Source: Preprints.org preprint supplement (doi:10.20944/preprints202403.1387.v1), 2024-03-23

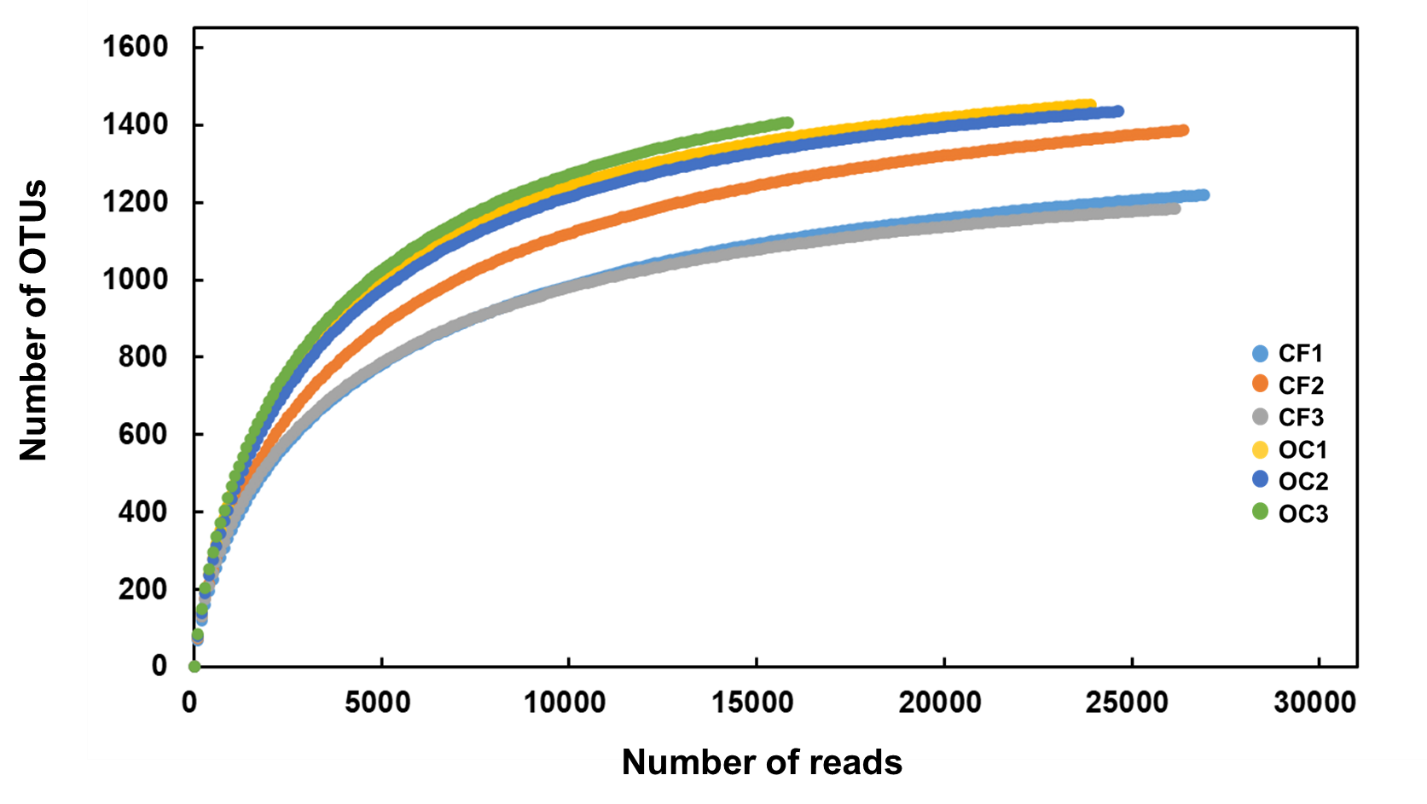


**Fig. S1.** Rarefaction curve of bacterial 16SrRNA sequences obtained from the studied soil groups.

Supplement: Supplementary file 1 [file supplementary]
